# Supplementary material
Source: PubMed Central journal article supplement (PMC4528734)
Supplement: supp_pp.15.00155_PP2015-00155R2_Supplemental_Table_S4.pdf [file supp_pp.15.00155_PP2015-00155R2_Supplemental_Table_S4.pdf]

1

Table S4. List of primers

| Brassica ID       | Code    | Arabidopsis ortholog | Annotation | Sense <sup>a</sup> | RT-qPCR                                          | ChIP-qPCR                                      |
|-------------------|---------|----------------------|------------|--------------------|--------------------------------------------------|------------------------------------------------|
| ERF65019          | HK1     | AT5G09810            | ACT7       | Fwd<br>Rev         | TCACCATCGGAGCTGAGAGA<br>GTCAGCGATTTCCTGGGAACA    |                                                |
| ERF92433          | HK2     | AT4G05320            | UBQ10      | Fwd<br>Rev         | GTCTACGTGGAGGCATGCAA<br>CCAAGGTCTGCCATCTTCC      |                                                |
| ERF76888ERC27105  | HK3     | AT3G60830            | ARP7       | Fwd<br>Rev         | AGCAAGCAGTGTGTCCCTT<br>TTCCAAGCTCTTGGGCGAAT      |                                                |
| ERF66723ERC45910  | A       | AT1G71697            | CK1        | Fwd<br>Rev         | CTAGGTTTCGACCTGGGGAGA<br>GCCGTTTAAAGGTAGGCCAGT   |                                                |
| ERF88347ERC28101  | B       | AT4G18880            | HSF A4A    | Fwd<br>Rev         | AGCTGATCCAGAGCAATGGG<br>AGGTTCCGGTAGAGAGTGGCT    |                                                |
| ERF88996ERC47120  | C       | AT3G20600            | NDR1       | Fwd<br>Rev         | AGGGCACAAGAAGAAAGCCA<br>CCGTCTGGTTGTTCACAGGA     |                                                |
| ERF66332ERC38887  | D       | AT5G06320            | NHL3       | Fwd<br>Rev         | TCGTGGAAGTTCAGCCGAA<br>TCAACGTCACACTTGGTCCG      |                                                |
| ERF81651ERC49894  | E       | AT3G52400            | SYPI22     | Fwd<br>Rev         | GTGGAGGAAGTGAACAGCGA<br>CCTTCAGTTCCTTGACGGCT     |                                                |
| ERF60873          | F, DHM6 | AT2G38470            | WRKY33     | Fwd<br>Rev         | AGAGGACGGTTACAACGGAGAAA<br>TGTCGGACAGCTTGGGAAAAG | ACCATCAGGAGTTTCTGCCTC<br>TCCTTTGCCTCCCTCCGTTG  |
| ERF79297ERC54097  | G       | AT4G23810            | WRKY53     | Fwd<br>Rev         | CAGAACTGTTGGGCAACGAA<br>GGGTCCTGCTGACAAGTG       |                                                |
| ERF79818+ERC46450 | C1      | AT4G36650            | PBRP       | Fwd<br>Rev         |                                                  | TTCCGATTCAGATCGTCGGAG<br>CAGCTAGATCCGTGCCGATA  |
| ERC43677          | C2      | AT4G33945            |            | Fwd<br>Rev         |                                                  | TTGAGTGTGTGGAGAGCGTC<br>GAGGCGGAGCAAGGAAGAAT   |
| ERF77271ERC26284  | DHM1    | AT1G73500            | MKK9       | Fwd<br>Rev         |                                                  | TCTCGTTAGGATCGGGTCCA<br>GCCGCCGATCTAGAGAACT    |
| ERF77038+ERC54974 | DHM2    | AT3G57530            | CPK32      | Fwd<br>Rev         |                                                  | ACCACCTTCACAAAGCTCCAT<br>GAGACAGGGGAGGTTTGGC   |
| ERF77259          | DHM3    | AT1G73730            | EIL3       | Fwd<br>Rev         |                                                  | CGGACATAGCGAGATCGGTT<br>TCCACCTGAACGACAGGAGA   |
| ERF60837          | DHM4    | AT2G38880            | NF_YB1     | Fwd<br>Rev         |                                                  | TCCCAACGAAAGATTGGGAA<br>CTCGCTGGTGATGAAGCTGAT  |
| ERC44219          | DHM5    | AT1G27340            | LCR        | Fwd<br>Rev         |                                                  | AATGGCTGCTACTGCTCCTG<br>AAGCTCTTCTCCATGCCCC    |
| ERF64179ERC41407  | DHM7    | AT1G54160            | NFYA5      | Fwd<br>Rev         |                                                  | ACCCCAAATCTCTGAGGGTG<br>TCCAAACACCAAAGGTCTCTCT |
| ERF86275ERC26603  | DHM8    | AT3G50070            | CYCD3;3    | Fwd<br>Rev         |                                                  | GTTCGAGGAAGACGAGAGCG<br>GTAACCTCGTCGTCGCCAT    |

2

<sup>a</sup> Fwd, forward; Rev, reverse
