# Supplementary material
Source: PubMed Central journal article supplement (PMC4528734)
Supplement: supp_pp.15.00155_PP2015-00155R2_Supplemental_Table_S7.pdf [file supp_pp.15.00155_PP2015-00155R2_Supplemental_Table_S7.pdf]

1 **Table S7.** *Arabidopsis* transcriptome data set

| Stress/Treatment | Tissue             | Treatment conditions                                     | GEO/ArrayExpress | Reference               |
|------------------|--------------------|----------------------------------------------------------|------------------|-------------------------|
| Heat             | Shoot              | 38°C; 15 min, 30 min, 1 h, 3 h                           | GSE5628          | Kilian et al. (2007)    |
| Cold             | Shoot              | 4°C; 30 min', 1 h, 3 h, 6 h, 12 h, 24 h                  | GSE5621          | Kilian et al. (2007)    |
| Salt             | Shoot              | 150 mM NaCl; 30 min', 1 h, 3 h, 6 h, 12 h, 24 h          | GSE5623          | Kilian et al. (2007)    |
| Osmotic          | Shoot              | 300 mM mannitol; 30 min, 1 h, 3 h, 6 h, 12 h, 24 h       | GSE5622          | Kilian et al. (2007)    |
| ABA              | Seedling           | 10 µM ABA; 30 min, 1 h, 3 h                              | GSE39384         | Goda et al.(2008)       |
| Mannitol         | Leaf               | 25 mM mannitol; proliferating/<br>expanding/ mature leaf | GSE16474         | Skirycz et al. (2010)   |
| Mannitol         | Proliferating leaf | 25 mM mannitol; 1.5 h, 3 h, 12 h, 24 h                   | GSE22107         | Skirycz et al. (2011)   |
| Mannitol*        | Leaf               | 300 mM mannitol; 3 h and 3 h+recovery                    | GSE36789         | Kinoshita et al. (2012) |
| Drought (1)      | Seedling           | Dehydration; 2 h, 24 h                                   | E-MEXP-2435      | Abdeen et al. (2010)    |
| Drought (2)      | Seedling           | Dehydration; 1 h, 4 h                                    | E-MEXP-2377      | Mizoguchi et al. (2010) |

- 2  
3 **Abdeen A, Schnell J, Miki B** (2010) Transcriptome analysis reveals absence of unintended effects in drought-tolerant transgenic  
4 plants overexpressing the transcription factor *ABF3*. *BMC Genomics* **11**: 69  
5 **Goda H, Sasaki E, Akiyama K, Maruyama-Nakashita A, Nakabayashi K, Li W, Ogawa M, Yamauchi Y, Preston J, Aoki K, et**  
6 **al** (2008) The AtGenExpress hormone and chemical treatment data set: experimental design, data evaluation, model data analysis  
7 and data access. *Plant J* **55**: 526-542  
8 **Kilian J, Whitehead D, Horak J, Wanke D, Weinl S, Batistic O, D'Angelo C, Bornberg-Bauer E, Kudla J, Harter K** (2007) The  
9 AtGenExpress global stress expression data set: protocols, evaluation and model data analysis of UV-B light, drought and cold  
10 stress responses. *Plant J* **50**: 347-363  
11 **Kinoshita N, Wang H, Kasahara H, Liu J, MacPherson C, Machida Y, Kamiya Y, Hannah MA, Chua N-H** (2012) *IAA-Ala*  
12 *Resistant3*, an evolutionarily conserved target of miR167, mediates *Arabidopsis* root architecture changes during high osmotic  
13 stress *Plant Cell* **24**: 3590-3602  
14 **Mizoguchi M, Umezawa T, Nakashima K, Kidokoro S, Takasaki H, Fujita Y, Yamaguchi-Shinozaki K, Shinozaki K** (2010)  
15 Two closely related subclass II SnRK2 protein kinases cooperatively regulate drought-inducible gene expression. *Plant Cell*  
16 *Physiol* **51**: 842-847  
17 **Skirycz A, Claeys H, De Bodt S, Oikawa A, Shinoda S, Andriankaja M, Maleux K, Barbosa Eloy N, Coppens F, Yoo S-D, et al**  
18 (2011) Pause-and-stop: the effects of osmotic stress on cell proliferation during early leaf development in *Arabidopsis* and a role  
19 for ethylene signaling in cell cycle arrest. *Plant Cell* **23**: 1876-1888  
20 **Skirycz A, De Bodt S, Obata T, De Clercq I, Claeys H, De Rycke R, Andriankaja M, Van Aken O, Van Breusegem F, Fernie**  
21 **AR, Inzé D** (2010) Developmental stage specificity and the role of mitochondrial metabolism in the response of *Arabidopsis*  
22 leaves to prolonged mild osmotic stress. *Plant Physiol* **152**: 226-244
