# Supplementary material
Source: PubMed Central journal article supplement (PMC4528734)
Supplement: supp_pp.15.00155_PP2015-00155R2_Supplemental_Table_S8.pdf [file supp_pp.15.00155_PP2015-00155R2_Supplemental_Table_S8.pdf]

1 **Table S8.** ChIP-seq count and mapping results

| Sample          | # Total reads | # Unique mapped reads (%) |                    |
|-----------------|---------------|---------------------------|--------------------|
|                 |               | <i>B. rapa</i>            | <i>B. oleracea</i> |
| Control_noAb    | 34,909,788    | 12,473,654 (35.7)         | 16,508,116 (47.3)  |
| Control_H3K4me3 | 26,331,226    | 10,944,508 (41.6)         | 13,859,574 (52.6)  |
| PEG1_H3K4me3    | 32,842,660    | 14,157,290 (43.1)         | 17,829,232 (54.3)  |

2
